# Supplementary material for: <em>Acinetobacter thutiue</em> sp. nov. and <em>Acinetobacter kontum</em> sp. nov., Isolated from Motorbike Repairing Workshop Soil
Source: Preprints.org preprint supplement (doi:10.20944/preprints202307.1271.v1), 2023-07-19
Supplement: Supplementary file 1 [file supplementary]

Jaisoo Kim, Ph.D.  
Department of Life Science  
Kyonggi University  
Suwon, Gyeonggi-Do, 16227, Republic of Korea

July 18, 2023

Editors-in-Chief  
diversity

Dear Editors-in-Chief:

Please find uploaded a file of original manuscript, titled “*Acinetobacter thutiue* sp. nov. and *Acinetobacter kontum* sp. nov., isolated from motorbike repairing workshop soil” by Nhan Le Thi Tuyet and Jaisoo Kim. For possible publication in the **diversity**, we would like to have this manuscript checked by editors and reviewers who are scientists in the area of Bacterial Systematics and/or Microbiology.

This manuscript introduces valuable isolates that may not been cultivated previously due to extreme conditions as well as its taxonomic and genomic properties. I believe that all the contents of this manuscript are suitable to the section, “**Microbial Diversity and Culture Collection.**”

Should you need to contact me, please use the above address or call me at +82-31-249-9648. You may also contact me by fax at +82-31-249-9604 or via email at jkimtamu@kgu.ac.kr.

Sincerely,

Jaisoo Kim, Ph.D.

enclosures
